# Supplementary material for: Exploiting Large Language Models for Diagnosing Autism Associated Language Disorders and Identifying Distinct Features
Source: Research Square preprint supplement (doi:10.21203/rs.3.rs-6931837/v1), 2025-07-29
Supplement: Supplementary file 1 [file 01257d438932032eadee2724.docx]

Author contribution C.H., L.K.P., S.W., X.L. designed research. C.H., W.L., performed experiments. C.H.,

W.L., X. Y., and M.R. analyzed data. C.H., S.W., and X.L. wrote the paper. All authors have read and

approved the manuscript.
