# Supplementary material for: Exploiting Large Language Models for Diagnosing Autism Associated Language Disorders and Identifying Distinct Features
Source: Research Square preprint supplement (doi:10.21203/rs.3.rs-6931837/v1), 2025-07-29
Supplement: Supplementary file 2 [file 1d33343ab76a7729d1d61b7a.docx]

The code accompanying this research is publicly available on GitHub: <https://github.com/cbhu523/chatgptASDdiagnosis>
