# Supplementary material for: Exploiting Large Language Models for Diagnosing Autism Associated Language Disorders and Identifying Distinct Features
Source: Research Square preprint supplement (doi:10.21203/rs.3.rs-6931837/v1), 2025-07-29
Supplement: Supplementary file 3 [file 30a85e762ecc0819e3644fde.docx]

This material is based upon work supported by the National Science Foundation under Grant No. HCC2401748 and the National Institute of Health under Grant No. R01MH129426. The funders had no role in study design, data collection and analysis, decision to publish, or preparation of the manuscript.
